# Supplementary material for: Neurosciences and Person-centered Psychotherapy in Patients With Dementia: A Systematic Review of Non- Pharmacological Interventions
Source: Research Square preprint supplement (doi:10.21203/rs.3.rs-7410026/v1), 2025-08-21
Supplement: Supplementary file 1 [file a2188925d7e5998940f5708b.docx]

**TITLE**

NEUROSCIENCES AND PERSON-CENTERED PSYCHOTHERAPY IN PATIENTS WITH DEMENTIA: A SYSTEMATIC REVIEW OF NON-PHARMACOLOGICAL INTERVENTIONS

**Author:** Maria Skotida
**Affiliation:** Aristotle University of Thessaloniki


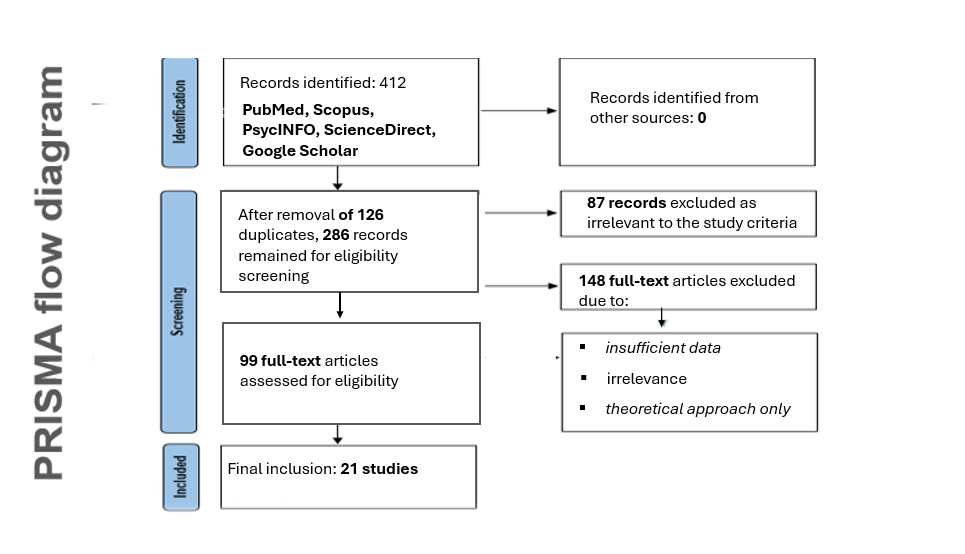


**Table Ι. Therapeutic Approaches, Benefits, and Limitations**

| **Therapeutic Approach** | **Benefits** | **Limitations** | |
| --- | --- | --- | --- |
| PCT | Adaptable to all stages of dementia, empathy, long-lasting effects | Requires change in care system attitudes | |
| CBT | Positive outcomes in early stages | Not applicable in middle/advanced stages | |
| Behavioral Interventions | Short-term reduction of “challenging” behaviors | Does not incorporate emotional experience |
| Music Therapy | Immediate impact on mood | Temporary effect, requires infrastructure | |
| VIPS (PCT application) | Holistic, reduction of medication, applicable in care units | Requires training and structural changes | |

- .

**Figure 1. Conceptual model of Person-Centered Therapy mechanisms in dementia.**

Person-Centered Therapy (PCT)

Emotional Safety & Empathy

**Biological Mechanisms**

- ↓ Cortisol
- ↓ Stress regulation
- ↑ Oxytocin
- ↑ Neuroplasticity

**Clinical Outcomes**

- Improved mood
- Reduced agitation
- Better communication
- Enhanced quality of life

**Table ΙΙ. Summary of Selected Studies on Person-Centered Therapy (PCT) in Dementia**

| **No.** | **Author(s)** | **Year** | **Type of Intervention** | **Main Findings** |
| --- | --- | --- | --- | --- |
| 1 | Sass et al. | 2021 | PCT | Improvement in mood and communication |
| 2 | Terkelsen et al. | 2020 | PCT + caregiver assessment | Reduction in anxiety and depression among caregivers |
| 3 | Frederiksen et al. | 2023 | PCT | Relief for caregivers, enhanced emotional connection |
| 4 | Judge et al. | 2023 | PCT | Reduction in aggression, improved cooperation |
| 5 | Nguyen et al. | 2021 | PCT vs Behavioral | Greater acceptance by patients, less authoritarian approach |
| 6 | Powers et al. | 2023 | PCT + Reminiscence therapy | Increased emotional engagement and sense of identity |
| 7 | Kindblom et al. | 2021 | Music therapy vs PCT | PCT provides longer-lasting effects |
| 8 | Liu et al. | 2022 | PCT | Reduction of caregiver burnout, improved care relationship |
| 9 | Brooker et al. | 2022 | PCT – VIPS framework | Care model with reduced medication use |
| 10 | Martinez et al. | 2022 | CBT vs PCT | PCT effective across all stages of dementia |
| 11 | Siegel | 2022 | Neurobiological effect of PCT | Reduced cortisol, improved homeostasis |
| 12 | Davidson & McEwen | 2021 | PCT | Increased neuroplasticity through relationship |
| 13 | Uvnäs-Moberg et al. | 2023 | PCT | Increased oxytocin, reduced medication use |
| 14 | Kumfor et al. | 2022 | PCT | Reduction in depression index, improved mood regulation |
| 15 | Brooker & Latham | 2021 | PCT in long-term care | 40% reduction in antipsychotic medication |
| 16 | Kim & Park | 2022 | PCT – Meta-analysis | Stabilization of cognitive decline, improved functionality |
| 17 | Saragih et al. | 2022 | PCT without pharmacological support | Improved mood and adaptation |
| 18 | Panza et al. | 2020 | PCT vs other psychosocial interventions | Better quality of life and engagement |
| 19 | Moon & Adams | 2023 | PCT with cultural adaptation | Increased effectiveness in minority groups |
| 20 | Cheston et al. | 2020 | PCT – Group therapy | Reduction in symptoms of isolation |
| 21 | Spector et al. | 2021 | PCT + cognitive support | Combined benefit in communication and cognition |

**Table ΙΙΙ Summary of Findings of the Selected Studies by Research Question**

| **Study** | **Research Question 1** | **Research Question 2** | **Research Question 3** | **Research Question 4** |
| --- | --- | --- | --- | --- |
| Saragih et al. (2022) | Reduction of disorganization, improved adaptation with consistent application of PCT | — | — | PCT as an alternative in cases of pharmacological treatment failure |
| Kim & Park (2022) | Slowing of cognitive decline, strengthening of meaningful dialogue and daily functioning | — | — | Reduction in antipsychotic use, enhanced cooperation |
| Powers et al. (2023) | Emotional connection through reminiscence therapy | — | — | — |
| Judge et al. (2023) | Improvement of behavior through stable therapeutic relationship | — | — | — |
| Frederiksen et al. (2023) | Reduction of caregiver burnout through person-centered practices | — | — | — |
| Nguyen et al. (2021) | — | Superiority of PCT over behavioral intervention in free expression and emotional safety | — | — |
| Martinez et al. (2022) | — | Limitations of CBT in early stages, superiority of PCT due to emotional approach | — | — |
| Kindblom et al. (2021) | — | Music therapy provides short-term benefits, whereas PCT delivers stable and lasting effects | — | — |
| Brooker et al. (2022) | — | Application of the VIPS model, enhancement of cooperation and emotional stability | Improvement of neurophysiological markers, reduced medication use | Integration of PCT into daily care systems with measurable outcomes |
| Liu et al. (2022) | — | Caregivers with PCT: less exhaustion, more positive attitudes toward patients | — | — |
| Davidson & McEwen (2021) | — | — | Strengthening of neuroplasticity and social responsiveness through therapeutic relationship | — |
| Uvnäs-Moberg et al. (2023) | — | — | Increased oxytocin levels and reduced need for pharmacological sedation in PCT environment | — |
